# Supplementary material for: The importance of individual beliefs in assessing treatment efficacy
Source: eLife. 2024 Mar 28;12:RP88889. doi: 10.7554/eLife.88889 (PMC10977967; doi:10.7554/eLife.88889)
Supplement: Figure 1—source data 2. — The table reports model comparison between the baseline (objective treatment), additive (objective treatment + subjective treatment), and interaction (objective treatment * subjective treatment) models. All models account for time. [file elife-88889-fig1-data2.xlsx]

## Sheet: Sheet1
Models	npar	AIC	BIC	logLik	deviance	Chisq	Df	Pr(>Chisq)
Baseline	9	2028.28	2062.53	-1005.14	2010.28
Additive	11	1985.62	2027.48	-981.811	1963.62	46.6595	2	7.37935e-11
Threeway	15	1988.51	2045.58	-979.253	1958.51	5.11602	4	0.275598
