# Supplementary material for: The importance of individual beliefs in assessing treatment efficacy
Source: eLife. 2024 Mar 28;12:RP88889. doi: 10.7554/eLife.88889 (PMC10977967; doi:10.7554/eLife.88889)
Supplement: Figure 1—source data 3. — The table reports model comparison between the baseline (subjective treatment), additive (subjective treatment + objective treatment), and interaction (subjective treatment * objective treatment) models. All models account for time. [file elife-88889-fig1-data3.xlsx]

## Sheet: Sheet1
Models	npar	AIC	BIC	logLik	deviance	Chisq	Df	Pr(>Chisq)
BaselineTreatment	7	1977.85	2004.49	-981.927	1963.85
AdditiveTreatment	11	1985.62	2027.48	-981.811	1963.62	0.232546	4	0.993742
ThreewayTreatment	15	1988.51	2045.58	-979.253	1958.51	5.11602	4	0.275598
