# Supplementary material for: The importance of individual beliefs in assessing treatment efficacy
Source: eLife. 2024 Mar 28;12:RP88889. doi: 10.7554/eLife.88889 (PMC10977967; doi:10.7554/eLife.88889)
Supplement: Figure 2—source data 1. — The table reportsmodel comparison between the baseline (objective treatment), additive (objective treatment + subjective treatment), and interaction (objective treatment * subjective treatment) models. [file elife-88889-fig2-data1.xlsx]

## Sheet: Sheet1
Models	Resid. Df	Resid. Dev	Df	Deviance	Pr(>Chi)
Objective treatment	96	82.9391
Subjective treatment	95	67.8634	1	15.0758	0.000103281
Subjective treatment:objective treatment	93	66.0823	2	1.78105	0.410439
