# Supplementary material for: The importance of individual beliefs in assessing treatment efficacy
Source: eLife. 2024 Mar 28;12:RP88889. doi: 10.7554/eLife.88889 (PMC10977967; doi:10.7554/eLife.88889)
Supplement: Figure 2—source data 4. — The table reports model comparison between the baseline (subjective treatment), additive (subjective treatment + objective treatment), and interaction (subjective treatment * objective treatment) models. [file elife-88889-fig2-data4.xlsx]

## Sheet: Sheet1
Models	Resid. Df	Resid. Dev	Df	Deviance	Pr(>Chi)
Subjective treatment	97	87.1698
Objective treatment	95	86.8988	2	0.271053	0.873256
Subjective treatment:objective treatment	93	86.2728	2	0.626012	0.731245
