# Supplementary material for: The importance of individual beliefs in assessing treatment efficacy
Source: eLife. 2024 Mar 28;12:RP88889. doi: 10.7554/eLife.88889 (PMC10977967; doi:10.7554/eLife.88889)
Supplement: Figure 3—source data 1. [file elife-88889-fig3-data1.xlsx]

## Sheet: Sheet1
Condition	Guess	n
active rTMS	subjective active	18
active rTMS	subjective sham	7
sham rTMS	subjective active	15
sham rTMS	subjective sham	12
