# Supplementary material for: The importance of individual beliefs in assessing treatment efficacy
Source: eLife. 2024 Mar 28;12:RP88889. doi: 10.7554/eLife.88889 (PMC10977967; doi:10.7554/eLife.88889)
Supplement: Figure 3—source data 2. — The table reports the BIC and AIC for model comparison between the baseline (objective treatment), additive (objective treatment + subjective treatment), and interaction (objective treatment * subjective treatment) models. All models account for time. [file elife-88889-fig3-data2.xlsx]

## Sheet: Sheet1
Models	npar	AIC	BIC	logLik	deviance	Chisq	Df	Pr(>Chisq)
Baseline	11	1604.16	1642.85	-791.081	1582.16
Additive	15	1606.97	1659.73	-788.486	1576.97	5.1899	4	0.268362
Threeway	19	1601.91	1668.75	-781.957	1563.91	13.0584	4	0.0109941
