# Supplementary material for: The importance of individual beliefs in assessing treatment efficacy
Source: eLife. 2024 Mar 28;12:RP88889. doi: 10.7554/eLife.88889 (PMC10977967; doi:10.7554/eLife.88889)
Supplement: Figure 3—source data 3. — The table reports the BIC and AIC for model comparison between the baseline (subjective treatment), additive (subjective treatment + objective treatment), and interaction (subjective treatment * objective treatment) models. All models account for time. [file elife-88889-fig3-data3.xlsx]

## Sheet: Sheet1
Models	npar	AIC	BIC	logLik	deviance	Chisq	Df	Pr(>Chisq)
BaselineTreatment	11	1605.64	1644.33	-791.821	1583.64
AdditiveTreatment	15	1606.97	1659.73	-788.486	1576.97	6.66947	4	0.154421
ThreewayTreatment	19	1601.91	1668.75	-781.957	1563.91	13.0584	4	0.0109941
