# Supplementary material for: The importance of individual beliefs in assessing treatment efficacy
Source: eLife. 2024 Mar 28;12:RP88889. doi: 10.7554/eLife.88889 (PMC10977967; doi:10.7554/eLife.88889)
Supplement: Figure 4—source data 1. — The table reports model comparison between the baseline (objective treatment), additive (objective treatment + subjective treatment), and interaction (objective treatment * subjective treatment) models. [file elife-88889-fig4-data1.xlsx]

## Sheet: Sheet1
Models	Resid. Df	Resid. Dev	Df	Deviance	Pr(>Chi)
Objective treatment	48	49.0545
Subjective treatment	47	47.9832	1	1.07126	0.300661
Subjective treatment:objective treatment	46	43.5135	1	4.46971	0.0345008
