# Supplementary material for: The importance of individual beliefs in assessing treatment efficacy
Source: eLife. 2024 Mar 28;12:RP88889. doi: 10.7554/eLife.88889 (PMC10977967; doi:10.7554/eLife.88889)
Supplement: Figure 4—source data 2. — The table reports model comparison between the baseline (subjective treatment), additive (subjective treatment + objective treatment), and interaction (subjective treatment * objective treatment) models. [file elife-88889-fig4-data2.xlsx]

## Sheet: Sheet1
Models	Resid. Df	Resid. Dev	Df	Deviance	Pr(>Chi)
Subjective treatment	48	49.2925
Objective treatment	47	47.9832	1	1.3093	0.252522
Subjective treatment:objective treatment	46	43.5135	1	4.46971	0.0345008
