# Supplementary material for: The importance of individual beliefs in assessing treatment efficacy
Source: eLife. 2024 Mar 28;12:RP88889. doi: 10.7554/eLife.88889 (PMC10977967; doi:10.7554/eLife.88889)
Supplement: Figure 4—source data 3. — The table reports model comparison betweenthe baseline (objective treatment), additive (objective treatment + subjective treatment), and interaction (objective treatment * subjective treatment) models. [file elife-88889-fig4-data3.xlsx]

## Sheet: Sheet1
Models	Resid. Df	Resid. Dev	Df	Deviance	Pr(>Chi)
Objective treatment	48	58.3243
Subjective treatment	47	57.9697	1	0.354556	0.551545
Subjective treatment:objective treatment	46	49.7977	1	8.172	0.00425421
