# Supplementary material for: The importance of individual beliefs in assessing treatment efficacy
Source: eLife. 2024 Mar 28;12:RP88889. doi: 10.7554/eLife.88889 (PMC10977967; doi:10.7554/eLife.88889)
Supplement: Figure 4—source data 4. — The table reports model comparison betweenthe baseline (subjective treatment), additive (subjective treatment + objective treatment), and interaction (subjective treatment * objective treatment) models. [file elife-88889-fig4-data4.xlsx]

## Sheet: Sheet1
Models	Resid. Df	Resid. Dev	Df	Deviance	Pr(>Chi)
Objective treatment	48	59.1023
Subjective treatment	47	57.9697	1	1.13255	0.287232
Subjective treatment:objective treatment	46	49.7977	1	8.172	0.00425421
