# Supplementary material for: The importance of individual beliefs in assessing treatment efficacy
Source: eLife. 2024 Mar 28;12:RP88889. doi: 10.7554/eLife.88889 (PMC10977967; doi:10.7554/eLife.88889)
Supplement: Figure 5—source data 1. [file elife-88889-fig5-data1.xlsx]

## Sheet: Sheet1
Objective treatment	Subjective treatment	n
active	active	16
active	sham	9
sham	active	13
sham	sham	15
