# Supplementary material for: The importance of individual beliefs in assessing treatment efficacy
Source: eLife. 2024 Mar 28;12:RP88889. doi: 10.7554/eLife.88889 (PMC10977967; doi:10.7554/eLife.88889)
Supplement: Figure 5—source data 2. — The table reports the BIC and AIC for model comparison between the baseline (objective treatment), additive (objective treatment + subjective treatment), and interaction (objective treatment * subjective treatment) models. All models account for time. [file elife-88889-fig5-data2.xlsx]

## Sheet: Sheet1
Models	npar	AIC	BIC	logLik	deviance	Chisq	Df	Pr(>Chisq)
Baseline	5	602.687	616.005	-296.344	592.687
Additive_model	6	593.808	609.789	-290.904	581.808	10.8792	1	0.000972522
Moderated_model	7	595.762	614.406	-290.881	581.762	0.0466355	1	0.829025
