# Supplementary material for: The importance of individual beliefs in assessing treatment efficacy
Source: eLife. 2024 Mar 28;12:RP88889. doi: 10.7554/eLife.88889 (PMC10977967; doi:10.7554/eLife.88889)
Supplement: Figure 5—source data 3. — The table reports the BIC and AIC for model comparison between the baseline (subjective treatment), additive (subjective treatment + objective treatment), and interaction (subjective treatment * objective treatment) models. All models account for time. [file elife-88889-fig5-data3.xlsx]

## Sheet: Sheet1
Models	npar	AIC	BIC	logLik	deviance	Chisq	Df	Pr(>Chisq)
Baseline_BlindingFirst	5	608.412	621.729	-299.206	598.412
Additive_model_BlindingFirst	6	593.808	609.789	-290.904	581.808	16.6037	1	4.60605e-05
Moderated_model_BlindingFirst	7	595.762	614.406	-290.881	581.762	0.0466355	1	0.829025
