# Supplementary material for: The importance of individual beliefs in assessing treatment efficacy
Source: eLife. 2024 Mar 28;12:RP88889. doi: 10.7554/eLife.88889 (PMC10977967; doi:10.7554/eLife.88889)
Supplement: Figure 6—source data 1. [file elife-88889-fig6-data1.xlsx]

## Sheet: Sheet1
Stimulation.group	Subjective treatment	n
Sham	Sham	21
Sham	Active	9
Anode 1mA	Sham	8
Anode 1mA	Active	22
Cathode 1.5mA	Sham	8
Cathode 1.5mA	Active	22
Cathode 1mA	Sham	14
Cathode 1mA	Active	16
Cathode 2mA	Sham	13
Cathode 2mA	Active	17
