# Supplementary material for: The importance of individual beliefs in assessing treatment efficacy
Source: eLife. 2024 Mar 28;12:RP88889. doi: 10.7554/eLife.88889 (PMC10977967; doi:10.7554/eLife.88889)
Supplement: Figure 6—source data 2. — The table reports the model comparison between the baseline (objective treatment), additive (objective treatment + subjective treatment) and interaction (objective treatment * subjective treatment) models. [file elife-88889-fig6-data2.xlsx]

## Sheet: Sheet1
Model	Res.Df	RSS	Df	Sum of Sq	F	Pr(>F)
Baseline	145	54.8861
Additive	144	53.3887	1	1.49739	4.08987	0.0450457
Threeway	140	51.257	4	2.13167	1.45558	0.219021
