# Supplementary material for: The importance of individual beliefs in assessing treatment efficacy
Source: eLife. 2024 Mar 28;12:RP88889. doi: 10.7554/eLife.88889 (PMC10977967; doi:10.7554/eLife.88889)
Supplement: Figure 6—source data 3. — The table reports the model comparison between the baseline (subjective treatment), additive (subjective treatment + objective treatment) and interaction (subjective treatment * objective treatment) models. [file elife-88889-fig6-data3.xlsx]

## Sheet: Sheet1
Model	Res.Df	RSS	Df	Sum of Sq	F	Pr(>F)
Baseline_Subjective Treatment	148	56.3567
Additive	144	53.3887	4	2.96808	2.0267	0.0939281
Threeway	140	51.257	4	2.13167	1.45558	0.219021
