# Supplementary material for: The importance of individual beliefs in assessing treatment efficacy
Source: eLife. 2024 Mar 28;12:RP88889. doi: 10.7554/eLife.88889 (PMC10977967; doi:10.7554/eLife.88889)
Supplement: Figure 6—source data 4. — The table reports the model comparison between the baseline (objective treatment), additive (objective treatment + subjective dosage) and interaction (objective treatment * subjective dosage) models. [file elife-88889-fig6-data4.xlsx]

## Sheet: Sheet1
Model	Res.Df	RSS	Df	Sum of Sq	F	Pr(>F)
Baseline	145	54.8861
Additive	142	51.3563	3	3.52977	3.21441	0.0251213
Threeway	130	47.5847	12	3.77161	0.858662	0.590393
