# Supplementary material for: The importance of individual beliefs in assessing treatment efficacy
Source: eLife. 2024 Mar 28;12:RP88889. doi: 10.7554/eLife.88889 (PMC10977967; doi:10.7554/eLife.88889)
Supplement: Figure 6—source data 5. — The table reports the model comparison between the baseline (subjective dosage), additive (subjective dosage + objective treatment) and interaction (subjective dosage * objective treatment) models. [file elife-88889-fig6-data5.xlsx]

## Sheet: Sheet1
Model	Res.Df	RSS	Df	Sum of Sq	F	Pr(>F)
Baseline	146	54.1607
Additive_ObjectiveTreatment	142	51.3563	4	2.80444	1.94458	0.106428
Threeway	139	50.1159	3	1.24039	1.14677	0.332546
